# Supplementary material for: Association of Access to Crisis Intervention Teams With County Sociodemographic Characteristics and State Medicaid Policies and Its Implications for a New Mental Health Crisis Lifeline
Source: PubMed Central journal article supplement (PMC9287760; doi:10.1001/jamanetworkopen.2022.24803), 2022-07-15
Supplement: jamanetwopen-e2224803-s001.pdf [file jamanetwopen-e2224803-s001.pdf]

## Supplemental Online Content

Newton H, Beetham T, Busch SH. Association of access to crisis intervention teams with county sociodemographic characteristics and state Medicaid policies and its implications for a new mental health crisis lifeline. *JAMA Netw Open*. 2022;5(7):e2224803.  
doi:10.1001/jamanetworkopen.2022.24803

**eTable 1.** Associations Between Area and State Medicaid Characteristics and Change in County-Level Access to CIT, 2015 to 2020

**eTable 2.** Logistic Regression Results (Main Specification)

**eTable 3.** Logistic Regression Results Excluding and Including Measures of Need (Suicide and Overdose Mortality Rates)

This supplemental material has been provided by the authors to give readers additional information about their work.

**eTable 1.** Associations Between Area and State Medicaid Characteristics and Change in County-Level Access to CIT, 2015 to 2020

|                                                      | No access<br>2015 and<br>2020 | Access<br>2015, No<br>access<br>2020 | No access<br>in 2015,<br>Access<br>2020 | Access<br>2015 and<br>2020 | p-<br>value |
|------------------------------------------------------|-------------------------------|--------------------------------------|-----------------------------------------|----------------------------|-------------|
| <b>N Counties</b>                                    | 1244                          | 268                                  | 293                                     | 1337                       |             |
| (% Sample)                                           | (40%)                         | (9%)                                 | (9%)                                    | (43%)                      |             |
| County Population in 2020 (total)                    | 28,142,429                    | 12,392,009                           | 14,893,144                              | 274,056,541                |             |
| <b>Area Characteristics</b>                          |                               |                                      |                                         |                            |             |
| <b>Age Distribution</b> (1=top quartile)             |                               |                                      |                                         |                            |             |
| Age >55 years                                        | 36%                           | 20%                                  | 23%                                     | 16%                        | <0.01       |
| <b>Demographics</b> (1=top quartile)                 |                               |                                      |                                         |                            |             |
| Uninsured                                            | 34%                           | 27%                                  | 24%                                     | 16%                        | <0.01       |
| Unemployed                                           | 23%                           | 25%                                  | 22%                                     | 28%                        | 0.09        |
| Living at or below FPL                               | 19%                           | 20%                                  | 24%                                     | 32%                        | <0.01       |
| <b>Race/Ethnicity</b> (1=top quartile)               |                               |                                      |                                         |                            |             |
| White                                                | 29%                           | 25%                                  | 27%                                     | 21%                        | 0.11        |
| Black                                                | 24%                           | 23%                                  | 25%                                     | 26%                        | 0.75        |
| Asian                                                | 11%                           | 15%                                  | 22%                                     | 40%                        | <0.01       |
| Native Hawaiian/Pacific Islander                     | 20%                           | 24%                                  | 23%                                     | 30%                        | 0.01        |
| American Indian/Alaskan Native                       | 27%                           | 26%                                  | 21%                                     | 24%                        | 0.41        |
| Hispanic                                             | 23%                           | 21%                                  | 23%                                     | 28%                        | 0.53        |
| <b>Residential Segregation</b> (1=top quartile)      | 20%                           | 18%                                  | 19%                                     | 31%                        | 0.02        |
| Most Segregated (Non-White/White)                    |                               |                                      |                                         |                            |             |
| <b>Need for Services</b>                             |                               |                                      |                                         |                            |             |
| <b>Behavioral health mortality 2020</b> (mean)       | 25%                           | 28%                                  | 26%                                     | 24%                        | 0.98        |
| Drug overdose deaths per 100,000 population          | 32%                           | 29%                                  | 23%                                     | 21%                        | 0.00        |
| Suicide deaths per 100,000 population                |                               |                                      |                                         |                            |             |
| <b>Rurality</b>                                      | 24%                           | 31%                                  | 38%                                     | 50%                        | <0.01       |
| Metro (non-rural)                                    | 39%                           | 56%                                  | 49%                                     | 42%                        | 0.08        |
| Micropolitan (rural)                                 | 37%                           | 14%                                  | 13%                                     | 8%                         | <0.01       |
| Frontier (rural)                                     | 36%                           | 20%                                  | 23%                                     | 16%                        | <0.01       |
| <b>State Medicaid Characteristics</b> (mean percent) |                               |                                      |                                         |                            |             |
| <b>Enacted Before 2020:</b>                          |                               |                                      |                                         |                            |             |
| Expanded Medicaid                                    | 50%                           | 60%                                  | 58%                                     | 70%                        | 0.01        |
| Any Behavioral Health Section 1115 Waiver            | 46%                           | 55%                                  | 55%                                     | 60%                        | 0.04        |
| IMD Payment Exclusion (substance use disorder)       | 41%                           | 50%                                  | 52%                                     | 51%                        | 0.11        |
| IMD Payment Exclusion (mental health)                | 2%                            | 6%                                   | 3%                                      | 5%                         | <0.01       |
| Eligibility Expansions                               | 4%                            | 6%                                   | 2%                                      | 9%                         | 0.19        |
| Delivery System Reforms                              | 4%                            | 5%                                   | 4%                                      | 5%                         | 0.78        |
| Community-Based Benefit Expansions                   | 22%                           | 30%                                  | 23%                                     | 32%                        | 0.09        |

|                                                                                                             |     |     |     |     |      |
|-------------------------------------------------------------------------------------------------------------|-----|-----|-----|-----|------|
| 2015 Certified Community Behavioral Health Clinic Demonstration Planning Grant State                        | 48% | 48% | 50% | 53% | 0.53 |
| Per-capita SAMHSA funding related to suicide prevention, crisis intervention, or diversion (1=top-quartile) | 22% | 25% | 18% | 26% | 0.51 |
| IMD DSH payments (1=top-quartile)                                                                           | 25% | 24% | 20% | 23% | 0.79 |
| <b>Enacted After 2020:</b>                                                                                  |     |     |     |     |      |
| American Rescue Plan CIT Development Planning Grant State                                                   | 27% | 32% | 31% | 39% | 0.05 |
| 988 Legislation Passed or Pending                                                                           | 35% | 32% | 42% | 42% | 0.42 |

**Notes:** eTable 1 reproduces Table 1, but instead examines the distribution of area and state characteristics by 4-category change in access to CIT variable (from Figure 1). IMD = Institutions of Mental Disease. DSH = Disproportionate Share Hospital. Three area characteristics have missing observations (measures of drug-related overdose deaths, suicide mortality, and residential segregation), percentages reported in this table reflect the percent among observations with non-missing values (n=1420, 763, 351 respectively).

| <b>eTable 2. Logistic Regression Results (Main Specification)</b> |                                             |                                             |
|-------------------------------------------------------------------|---------------------------------------------|---------------------------------------------|
|                                                                   | Dep. Var                                    |                                             |
|                                                                   | County-level Access to CIT in 2020<br>(0,1) |                                             |
|                                                                   | Logit                                       | Percentage<br>Point change in<br>likelihood |
|                                                                   | Beta<br>(SE)                                | Point Estimate<br>(SE)                      |
| <b>Area Characteristics</b>                                       |                                             |                                             |
| <b>Age Distribution (1=top quartile)</b>                          |                                             |                                             |
| Age >55 years                                                     | -0.143<br>(0.167)                           | -2.961<br>(3.507)                           |
| <b>Demographics (1=top quartile)</b>                              |                                             |                                             |
| Uninsured                                                         | -0.454**<br>(0.228)                         | -9.619**<br>(4.837)                         |
| Median Household Income                                           | -0.116<br>(0.119)                           | -2.390<br>(2.438)                           |
| Unemployed                                                        | 0.104<br>(0.131)                            | 2.142<br>(2.697)                            |
| <b>Race/Ethnicity (1=top quartile)</b>                            |                                             |                                             |
| White                                                             | 0.103<br>(0.170)                            | 2.121<br>(3.487)                            |
| Black                                                             | -0.167<br>(0.221)                           | -3.451<br>(4.584)                           |
| Hispanic                                                          | 0.179<br>(0.197)                            | 3.679<br>(4.005)                            |
| AI/AN                                                             | -0.0332<br>(0.204)                          | -0.683<br>(4.200)                           |
| Asian                                                             | 1.202***<br>(0.117)                         | 24.848***<br>(2.183)                        |
| NH/PI                                                             | -0.0359<br>(0.126)                          | -0.738<br>(3.160)                           |
| <b>Residential Segregation (1=top quartile)</b>                   |                                             |                                             |
| Most Segregated (Non-White/White)                                 | 0.386**<br>(0.158)                          | 7.928**<br>(3.209)                          |
| <b>Rurality</b>                                                   |                                             |                                             |
| Metro (urban)                                                     | <i>Reference</i>                            | <i>Reference</i>                            |
| Micropolitan (rural)                                              | -0.237***<br>(0.0911)                       | -5.037***<br>(1.980)                        |
| Frontier (rural)                                                  | -1.187***<br>(0.182)                        | -25.453***<br>(3.725)                       |
| <b>Need for Services</b>                                          |                                             |                                             |
| <b>Behavioral Health Mortality (2020) (1=top-quartile)</b>        |                                             |                                             |
| Suicide deaths per 100,000 population                             | -                                           | -                                           |
|                                                                   | -                                           | -                                           |
| Drug overdose deaths per 100,000 population                       | -                                           | -                                           |
|                                                                   | -                                           | -                                           |

| <b>State Medicaid Characteristics</b>                                                                       |         |          |
|-------------------------------------------------------------------------------------------------------------|---------|----------|
| <b>Enacted Before 2020:</b>                                                                                 |         |          |
| Expanded Medicaid                                                                                           | 0.476*  | 10.037*  |
|                                                                                                             | (0.264) | (5.604)  |
| Any Behavioral Health Section 1115 Waiver                                                                   | 0.824*  | 17.163   |
|                                                                                                             | (0.453) | (9.221)  |
| IMD Payment Exclusion (substance use disorder)                                                              | -0.914* | -17.483* |
|                                                                                                             | (0.491) | (8.399)  |
| IMD Payment Exclusion (mental health)                                                                       | 0.367   | 7.545    |
|                                                                                                             | (0.555) | (11.495) |
| Community-Based Benefit Expansions                                                                          | -0.0591 | -1.215   |
|                                                                                                             | (0.294) | (6.050)  |
| Eligibility Expansions                                                                                      | 0.0601  | 1.236    |
|                                                                                                             | (0.462) | (9.507)  |
| Delivery System Reforms                                                                                     | -0.419  | -8.688   |
|                                                                                                             | (0.335) | (6.956)  |
| 2015 Certified Community Behavioral Health Clinic Demonstration Planning Grant State                        | -0.0270 | -0.556   |
|                                                                                                             | (0.383) | (7.872)  |
| Per-capita SAMHSA funding related to suicide prevention, crisis intervention, or diversion (1=top-quartile) | -0.354  | -7.290   |
|                                                                                                             | (0.292) | (5.994)  |
| IMD DSH payments (1=top-quartile)                                                                           | -0.167  | -3.442   |
|                                                                                                             | (0.297) | (6.191)  |
| <b>Enacted After 2020:</b>                                                                                  |         |          |
| American Rescue Plan CIT Development Planning Grant State                                                   | 0.425*  | 8.752    |
|                                                                                                             | (0.225) | (4.558)  |
| 988 Legislation Passed or Pending                                                                           | 0.141   | 2.907    |
|                                                                                                             | (0.212) | (4.351)  |
| Constant                                                                                                    | -0.0425 |          |
|                                                                                                             | (0.321) |          |
| <b>Observations</b>                                                                                         | 2,790   | 2,790    |
| *** p<0.01, ** p<0.05, * p<0.1                                                                              |         |          |

**eTable 3.** Logistic Regression Results Excluding and Including Measures of Need (Suicide and Overdose Mortality Rates)

|                                                            | Dep. Var                                                          |                                                                             |
|------------------------------------------------------------|-------------------------------------------------------------------|-----------------------------------------------------------------------------|
|                                                            | County-level Access to CIT in 2020<br>(0,1)                       |                                                                             |
|                                                            | Excluding<br>measures of Need<br>(results shown in<br>manuscript) | Including<br>Measures of<br>Need<br>(results not<br>shown in<br>manuscript) |
|                                                            | Beta<br>(SE)                                                      | Beta<br>(SE)                                                                |
| <b>Area Characteristics</b>                                |                                                                   |                                                                             |
| <b>Age Distribution</b> (1=top quartile)                   |                                                                   |                                                                             |
| Age >55 years                                              | -0.143<br>(0.167)                                                 | 0.271<br>(0.227)                                                            |
| <b>Demographics</b> (1=top quartile)                       |                                                                   |                                                                             |
| Uninsured                                                  | -0.454**<br>(0.228)                                               | -0.245<br>(0.215)                                                           |
| Median Household Income                                    | -0.116<br>(0.119)                                                 | -0.311*<br>(0.180)                                                          |
| Unemployed                                                 | 0.104<br>(0.131)                                                  | -0.0348<br>(0.160)                                                          |
| <b>Race/Ethnicity</b> (1=top quartile)                     |                                                                   |                                                                             |
| White                                                      | 0.103<br>(0.170)                                                  | -0.119<br>(0.153)                                                           |
| Black                                                      | -0.167<br>(0.221)                                                 | -0.0380<br>(0.196)                                                          |
| Hispanic                                                   | 0.179<br>(0.197)                                                  | 0.183<br>(0.237)                                                            |
| American Indian/Alaskan Native                             | -0.0332<br>(0.204)                                                | 0.176<br>(0.244)                                                            |
| Asian                                                      | 1.202***<br>(0.117)                                               | 1.155***<br>(0.132)                                                         |
| Native Hawaiian/Pacific Islander                           | -0.0359<br>(0.126)                                                | -0.298*<br>(0.160)                                                          |
| <b>Residential Segregation</b> (1=top quartile)            |                                                                   |                                                                             |
| Most Segregated (Non-White/White)                          | 0.386**<br>(0.158)                                                | 0.536***<br>(0.169)                                                         |
| <b>Rurality</b>                                            |                                                                   |                                                                             |
| Metro (urban)                                              | <i>Reference</i>                                                  | <i>Reference</i>                                                            |
| Micropolitan (rural)                                       | -0.237***<br>(0.0911)                                             | -0.381***<br>(0.144)                                                        |
| Frontier (rural)                                           | -1.187***<br>(0.182)                                              | -0.694*<br>(0.398)                                                          |
| <b>Need for Services</b>                                   |                                                                   |                                                                             |
| <b>Behavioral Health Mortality (2020)</b> (1=top-quartile) |                                                                   |                                                                             |
| Suicide deaths per 100,000 population                      | -                                                                 | -0.0320                                                                     |

|                                                                                                             |         |          |
|-------------------------------------------------------------------------------------------------------------|---------|----------|
|                                                                                                             | -       | (0.184)  |
| Drug overdose deaths per 100,000 population                                                                 | -       | -0.224   |
|                                                                                                             | -       | (0.153)  |
|                                                                                                             |         |          |
| <b>State Medicaid Characteristics</b>                                                                       |         |          |
| <b>Enacted Before 2020:</b>                                                                                 |         |          |
| Expanded Medicaid                                                                                           | 0.476*  | 0.872*** |
|                                                                                                             | (0.264) | (0.218)  |
| Any Behavioral Health Section 1115 Waiver                                                                   | 0.824*  | 0.764**  |
|                                                                                                             | (0.453) | (0.385)  |
| IMD Payment Exclusion (substance use disorder)                                                              | -0.914* | -0.948** |
|                                                                                                             | (0.491) | (0.479)  |
| IMD Payment Exclusion (mental health)                                                                       | 0.367   | 0.184    |
|                                                                                                             | (0.555) | (0.531)  |
| Community-Based Benefit Expansions                                                                          | -0.0591 | -0.148   |
|                                                                                                             | (0.294) | (0.213)  |
| Eligibility Expansions                                                                                      | 0.0601  | 0.268    |
|                                                                                                             | (0.462) | (0.456)  |
| Delivery System Reforms                                                                                     | -0.419  | -0.452   |
|                                                                                                             | (0.335) | (0.425)  |
| 2015 Certified Community Behavioral Health Clinic Demonstration Planning Grant State                        | -0.0270 | -0.206   |
|                                                                                                             | (0.383) | (0.302)  |
| Per-capita SAMHSA funding related to suicide prevention, crisis intervention, or diversion (1=top-quartile) | -0.354  | -0.274   |
|                                                                                                             | (0.292) | (0.292)  |
| IMD DSH payments (1=top-quartile)                                                                           | -0.167  | -0.220   |
|                                                                                                             | (0.297) | (0.250)  |
| <b>Enacted After 2020:</b>                                                                                  |         |          |
| American Rescue Plan CIT Development Planning Grant State                                                   | 0.425*  | 0.362*   |
|                                                                                                             | (0.225) | (0.194)  |
| 988 Legislation Passed or Pending                                                                           | 0.141   | 0.359    |
|                                                                                                             | (0.212) | (0.240)  |
| Constant                                                                                                    | -0.0425 | 0.268    |
|                                                                                                             | (0.321) | (0.378)  |
|                                                                                                             |         |          |
| <b>Observations</b>                                                                                         | 2,790   | 1,692    |
|                                                                                                             |         |          |
| *** p<0.01, ** p<0.05, * p<0.1                                                                              |         |          |
